# Supplementary material for: Matrix metalloproteinase-10 promotes kidney fibrosis by transactivating β-catenin signaling
Source: Springer Nature journal article supplement (doi:10.1038/s41420-025-02521-w), 2025-05-17
Supplement: MOESM1 [file 41420_2025_2521_MOESM1_ESM.pdf]

# Matrix metalloproteinase-10 promotes kidney fibrosis by transactivating $\beta$ -catenin signaling

Xiaoli Sun, Qian Ren, Xi Liu, Huishi Tan, Zhanji Zhan, Enqing Lin, Yinyi Long, Xue Hong, Lili

Zhou and Youhua Liu

## SUPPLEMENTARY FIGURES AND TABLES

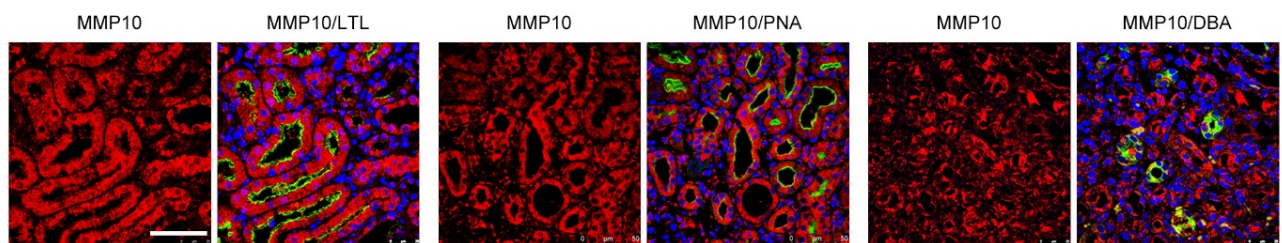

**Supplementary Figure S1. Localization of MMP-10 in the kidney subjected to unilateral ureteral obstruction (UUO).** In mouse UUO kidney, colocalization of MMP-10 (Red) and various segment-specific renal tubular markers (Green), including proximal tubule marker lotus tetragonolobus (LTL), distal tubule marker peanut agglutinin (PNA), and collecting duct marker dolichos biflorus agglutinin (DBA), could be observed. Scale bar, 50  $\mu$ m.

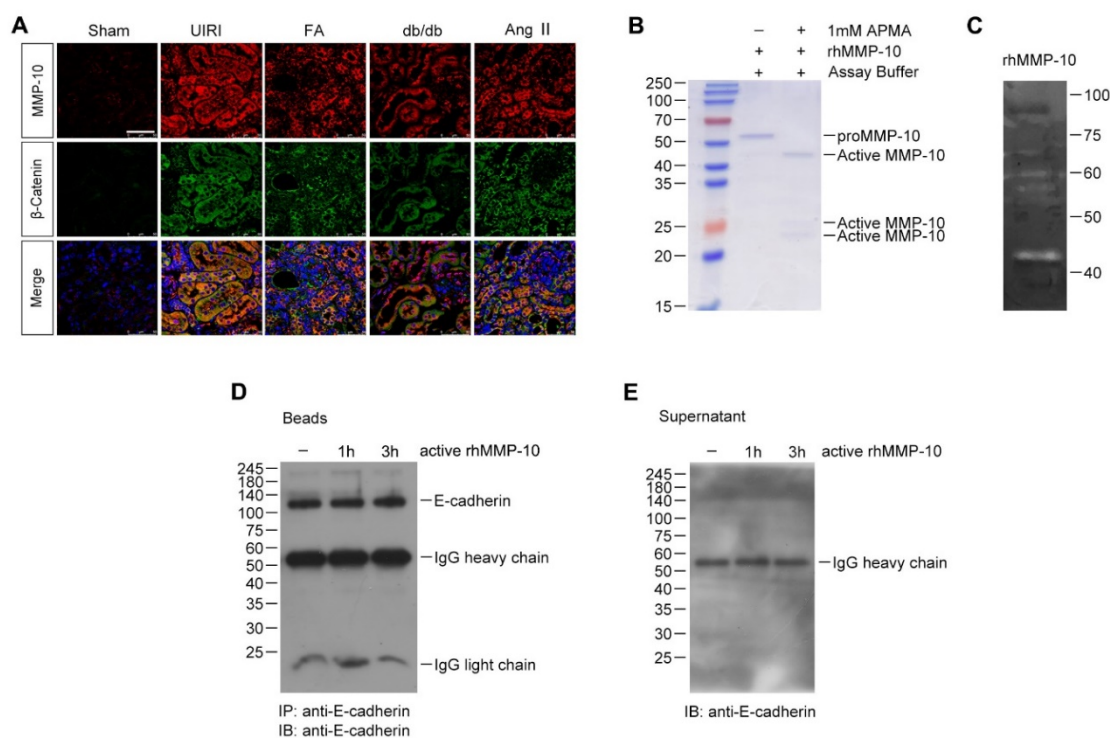

**Supplementary Figure S2. E-cadherin is not a direct substrate of MMP-10.** (A) In various experimental animal models, representative images of double immunofluorescence staining for MMP-10 (red) and  $\beta$ -catenin (Green) were shown. Scar bar, 50  $\mu$ m. (B) The recombinant human proMMP-10 protein was activated in a buffer solution containing 1 mM APMA. (C) The enzymatic activity of the rhMMP-10 protein after activation was demonstrated through gelatin zymography. (D) Western blot analysis revealed that active MMP-10 did not degrade E-cadherin protein precipitated by anti-E-cadherin antibody. The overall protein level of E-cadherin after incubation with active MMP-10 remained unchanged. (E) Western blot analysis revealed no enzymatic hydrolysis of E-cadherin protein by active MMP-10. No notable fragments of E-cadherin were detected in the supernatants.

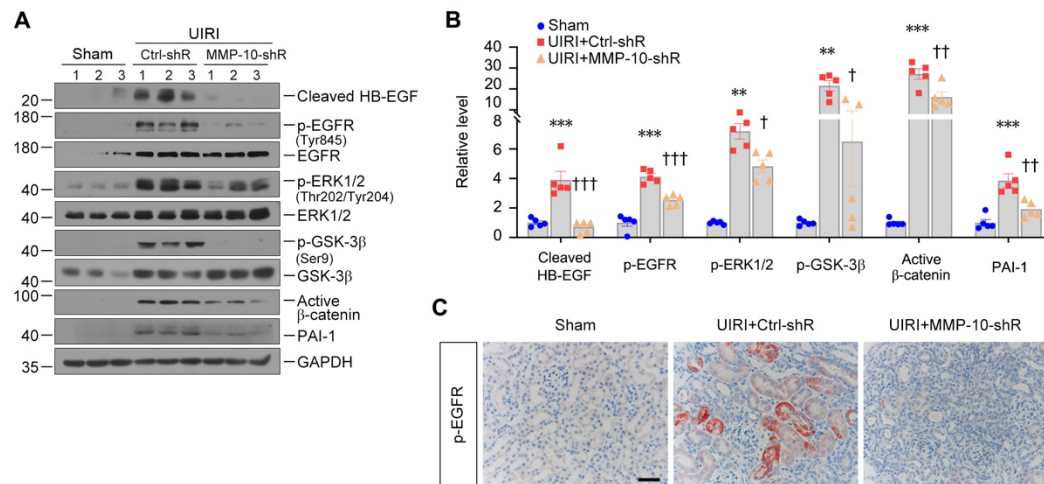

**Supplementary Figure S3. Knockdown of MMP-10 inhibits EGFR-mediated transactivation of β-catenin in unilateral ischemia-reperfusion injury (UIRI).** (A, B) Representative Western blots and graphic presentations showed the renal expression of cleaved HB-EGF, p-EGFR (Tyr845), total EGFR, p-ERK1/2 (Tyr202/Tyr204), total ERK1/2, p-GSK3β (Ser9), total GSK3β, active β-catenin, and PAI-1 in different groups as indicated. Data are presented as the mean ± SEM.  $^{**}P < 0.01$ ,  $^{***}P < 0.001$  versus sham controls (n = 5).  $^{†}P < 0.05$ ,  $^{††}P < 0.01$ ,  $^{†††}P < 0.001$  versus UIRI injected with Ctrl-shRNA (n = 5). (C) Immunohistochemical staining showed tubular phosphorylated EGFR in various groups as indicated. Scale bar, 50 μm.

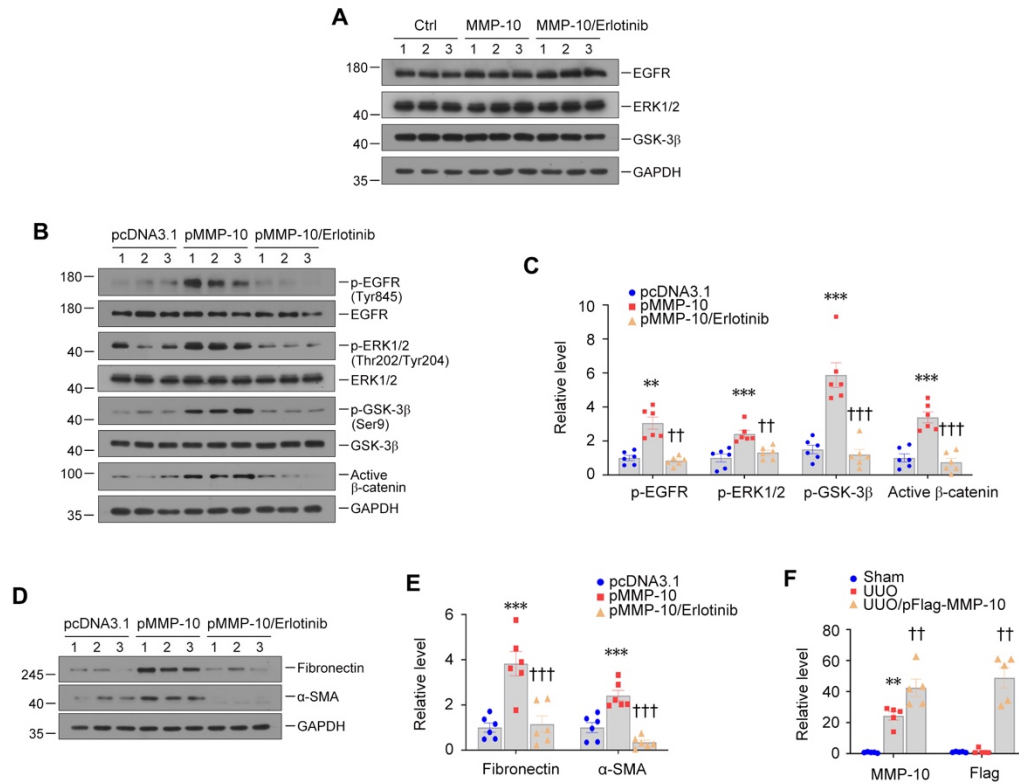

**Supplementary Figure S4. Blockade of EGFR activation by erlotinib abolishes MMP-10-induced β-catenin activation.** (A) Representative Western Blots analyses illustrated that neither rhMMP-10 nor erlotinib affected the protein levels of total EGFR, ERK1/2, and GSK-3β. (B, C) Erlotinib inhibited β-catenin activation in HK-2 cells after transfection of MMP-10 expression vector. Representative Western blots and graphic presentations showed protein expression of p-EGFR (Tyr845), EGFR, p-ERK1/2 (Thr202/Tyr204), ERK1/2, p-GSK-3β (Ser9), GSK-3β, and active β-catenin after various treatments in HK-2 cells. Data are presented as the mean ± SEM.  $**P < 0.01$ ,  $***P < 0.001$  versus controls (n = 6).  $^{++}P < 0.01$ ,  $^{+++}P < 0.001$  versus the group with pFlag-MMP-10 transfection alone (n = 6). (D, E) Representative Western blots and graphic presentations showed fibronectin and α-SMA levels in different groups as indicated. Data are presented as the mean ± SEM.  $***P < 0.001$  versus controls (n = 6).  $^{+++}P < 0.001$  versus the group with pFlag-MMP-10 transfection alone (n = 6). (F) Quantitative data of MMP-10 and Flag in UUO mice after plasmid injection. Data are presented as the mean ± SEM.  $**P < 0.01$  versus sham controls (n = 5).  $^{++}P < 0.01$  versus UUO plus pcDNA3.1 group (n = 5).

**Supplementary Table S1. The sources of antibodies used in this study**

| Antibodies                       | Catalogue number    | Company                   | Location          |
|----------------------------------|---------------------|---------------------------|-------------------|
| <b>Primary antibodies</b>        |                     |                           |                   |
| Anti-MMP-10                      | AF-910 (For IHC/IF) | R&D SYSTEMS               | Minneapolis, MN   |
| Anti-MMP-10                      | sc-80197 (For WB)   | Santa Cruz Biotechnology  | Santa Cruz, CA    |
| Anti-flag                        | F1804               | Sigma-Aldrich             | St. Louis, MO     |
| Anti-LTL                         | FL-1321             | VECTOR Laboratories       | San Francisco, CA |
| Anti-PNA                         | FL-1071             | VECTOR Laboratories       | San Francisco, CA |
| Anti-DBA                         | FL-1031             | VECTOR Laboratories       | San Francisco, CA |
| DAPI                             | C1006               | Beyotime                  | Shanghai, China   |
| Anti-fibronectin                 | F3648               | Sigma-Aldrich             | St. Louis, MO     |
| Anti- $\alpha$ -SMA              | A2547               | Sigma-Aldrich             | St. Louis, MO     |
| Anti-vimentin                    | Ab8978              | Abcam                     | Cambridge, MA     |
| Anti-collagen I                  | Ba0325              | Boster Biotechnology      | Wuhan, China      |
| Anti-KIM-1                       | BA3537 (For WB)     | Boster Biotechnology      | Wuhan, China      |
| Anti-KIM-1                       | AF1817 (For IHC)    | R&D SYSTEMS               | Minneapolis, MN   |
| Anti-active $\beta$ -catenin     | #4270               | Cell Signaling Technology | Danvers, MA       |
| Anti- $\beta$ -catenin           | 610154              | BD biosciences            | San Jose, CA      |
| Anti-PAI-1                       | AF1786              | R&D SYSTEMS               | Minneapolis, MN   |
| Anti-MMP-7                       | GTX104658           | GeneTex                   | Irvine, CA        |
| Anti-GAPDH                       | RM2002              | Ray Antibody Biotech      | Beijing, China    |
| Anti- $\alpha$ -tubulin          | RM2007              | Ray Antibody Biotech      | Beijing, China    |
| Anti- $\beta$ -actin             | RM2001              | Ray Antibody Biotech      | Beijing, China    |
| Anti-E-cadherin                  | Ab76055 (For WB)    | Abcam                     | Cambridge, MA     |
| Anti-E-cadherin                  | 14472S (For IP)     | Cell Signaling Technology | Danvers, MA       |
| Anti-HB-EGF                      | sc-74526            | Santa Cruz Biotechnology  | Santa Cruz, CA    |
| Anti-p-EGFR (Tyr845)             | #2231 (For IHC)     | Cell Signaling Technology | Danvers, MA       |
| Anti-p-EGFR (Tyr845)             | sc-57542 (For WB)   | Santa Cruz Biotechnology  | Santa Cruz, CA    |
| Anti-EGFR                        | sc-373746           | Santa Cruz Biotechnology  | Santa Cruz, CA    |
| Anti-p-GSK-3 $\beta$ (Ser9)      | #9336               | Cell Signaling Technology | Danvers, MA       |
| Anti-GSK-3 $\beta$               | #9315               | Cell Signaling Technology | Danvers, MA       |
| Anti-ERK1/2                      | #4695               | Cell Signaling Technology | Danvers, MA       |
| Anti-p-ERK1/2<br>(Tyr202/Tyr204) | #9101               | Cell Signaling Technology | Danvers, MA       |
| <b>Secondary antibodies</b>      |                     |                           |                   |
| Goat anti-mouse                  | BA1050 (For WB)     | Boster Biotechnology      | Wuhan, China      |
| Goat anti-rabbit                 | BA1054 (For WB)     | Boster Biotechnology      | Wuhan, China      |
| Rabbit anti-goat                 | BA1060 (For WB)     | Boster Biotechnology      | Wuhan, China      |

**Supplementary Table S1 (Continued). The sources of antibodies used in this study**

| Antibodies         | Catalogue number       | Company                | Location       |
|--------------------|------------------------|------------------------|----------------|
| Donkey Anti-Mouse  | 715-0165-150 (For IHC) | Jackson ImmunoResearch | West Grove, PA |
| Donkey Anti-Rabbit | 711-065-152 (For IHC)  | Jackson ImmunoResearch | West Grove, PA |
| Donkey Anti-Goat   | 705-065-147 (For IHC)  | Jackson ImmunoResearch | West Grove, PA |
| Donkey Anti-Mouse  | 715-225-150 (For IF)   | Jackson ImmunoResearch | West Grove, PA |
| Donkey Anti-Rabbit | 711-1165-152 (For IF)  | Jackson ImmunoResearch | West Grove, PA |
| Donkey Anti-Goat   | 705-165-003 (For IF)   | Jackson ImmunoResearch | West Grove, PA |

**Supplementary Table S2. The nucleotide sequences of primers used for qRT-PCR in this study**

| Gene          | Species | Primer Sequence 5' to 3' |                        |
|---------------|---------|--------------------------|------------------------|
|               |         | Forward                  | Reverse                |
| <i>Mmp10</i>  | Mouse   | GACCCCACTCACTTTCTCCA     | GGAATAAGTTGGTCCCTGAGG  |
| <i>MMP10</i>  | Human   | CCACTCTACAACATTCACA      | TGAATGCCATTACATCATCTTG |
| <i>WNT1</i>   | Human   | ACCCAATCCCTCTCCACTCT     | GATTCAAGGAAAAGCCACCA   |
| <i>WNT2</i>   | Human   | GTGGATGCAAAGGAAAGGAA     | AGCCAGCATGTCCTGAGAGT   |
| <i>WNT2B</i>  | Human   | GTGTCCTGGCTGGTTCCTTA     | AGCTGGTGCAAAGGAAAGAA   |
| <i>WNT3</i>   | Human   | TGTGAGGTGAAGACCTGCTG     | AAAGTTGGGGGAGTTCTCGT   |
| <i>WNT3A</i>  | Human   | CAAGATTGGCATCCAGGAGT     | ATGAGCGTGTCACTGCAAAG   |
| <i>WNT4</i>   | Human   | ATGGAAGTCACACCCTCTGG     | CCTGGAAGGACCCACAGATA   |
| <i>WNT5A</i>  | Human   | GGGTGGGAACCAAGAAAAAT     | TGGAACCTACCCATCCCATA   |
| <i>WNT5B</i>  | Human   | AAGAAGTGCACGGAGATCGT     | CACCCACCAAGAGGAGAGAA   |
| <i>WNT6</i>   | Human   | GTCACGCAGGCCTGTTCTAT     | CGTCCATAAAGAGCCTCGAC   |
| <i>WNT7A</i>  | Human   | CCCACCTTCCTGAAGATCAA     | ACAGCACATGAGGTCACAGC   |
| <i>WNT7B</i>  | Human   | TCAACGAGTGCCAGTACCAG     | CCCTCGGCTTGGTTGTAGTA   |
| <i>WNT8A</i>  | Human   | GAAGTCCCCTGAAAATGCTC     | ATCCTTTCCCCAAATTCCAC   |
| <i>WNT9A</i>  | Human   | GCAAGCATCTGAAGCACAAG     | TGCTCTCGCAGTTCTTCTCA   |
| <i>WNT9B</i>  | Human   | GAGGACTCACCCAGCTTCTG     | TAGGCCTAGTGCTTGCAGGT   |
| <i>WNT10A</i> | Human   | GGTTGCTCCACACCCTAAAA     | ATGATGAAGGGAATGGTGGA   |
| <i>WNT10B</i> | Human   | TCTGACAAGGGGACAGAACC     | TCATTGCTTAGAGCCCGACT   |
| <i>WNT11</i>  | Human   | CAGGCAGTGCAACAAGACAT     | TGAGGGTCCTTGAGCAGAGT   |
| <i>WNT16</i>  | Human   | AAATGCGCAGGAGAGAAAAA     | ACCCTCTGATGTACGGTTGC   |
| <i>ACTB</i>   | Human   | CTCACCATGGATGATGATATCGC  | AGGAATCCTTCTGACCCATGC  |
| <i>Actb</i>   | Mouse   | CAGCTGAGAGGGAAATCGTG     | CGTTGCCAATAGTGATGACC   |
